# Supplementary material
Source: publisher site journal article supplement (https://cdn.jamanetwork.com/ama/content_public/journal/faci/935283/qoi150050supp1_prod.pdf)
Supplement: Supplementary file 1 [file qoi150050supp1_prod.pdf]

## Supplementary Online Content

Teti VP, Akdagli S, Most SP. Cost-effectiveness of corticosteroid nasal spray vs surgical therapy in patients with severe to extreme anatomical nasal obstruction. *JAMA Facial Plast Surg*. Published online January 7, 2016. doi:10.1001/jamafacial.2015.2039.

**eFigure 1.** Markov Model

**eFigure 2.** Cost Analysis Graph

**eTable 1.** Cost Data for Medical or Surgical Treatment of Nasal Obstruction

**eTable 2.** Demographics and History of Patients Who Responded to Nasal Corticosteroid Treatment

**eTable 3.** Cost of Intranasal Corticosteroid Sprays

This supplementary material has been provided by the authors to give readers additional information about their work.

**eFigure 1. Markov Model**

Figure 1

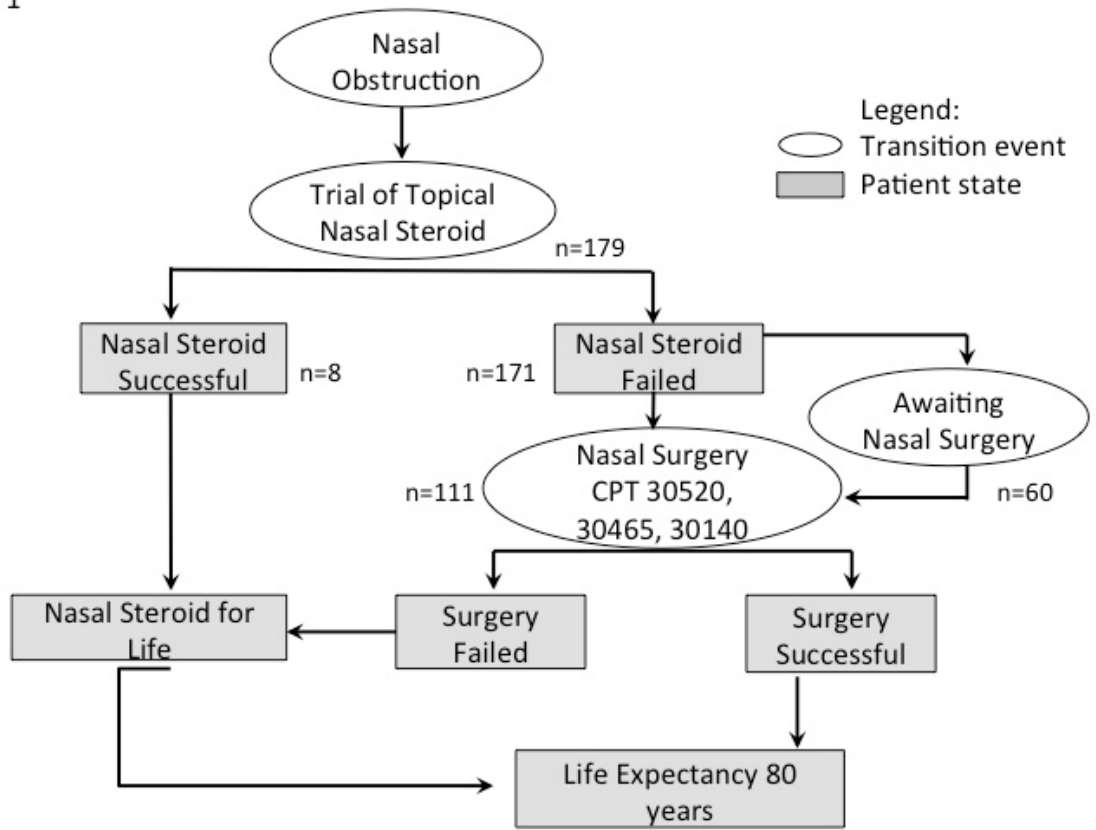

Each circle depicts a decision node, which requires medical decisions; boxes represent patient states in which no further medical decisions are required. CPT indicates *Current Procedural Terminology*.

**eFigure 2.** Cost Analysis Graph

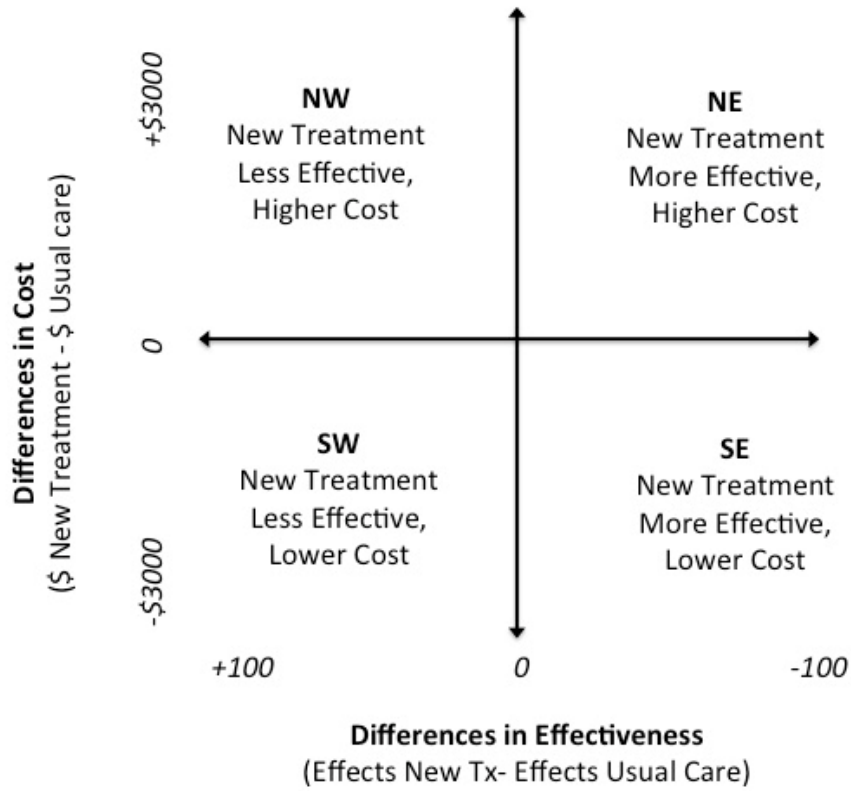

All possible results of a cost-effectiveness analysis divided into 4 quadrants. NE indicates northeast; NW, northwest; SE, southeast; and SW, southwest.

**eTable 1.** Cost Data for Medical or Surgical Treatment of Nasal Obstruction

| CPT       | Description                  | Cost (US Dollars) |              |                        |                            |           |
|-----------|------------------------------|-------------------|--------------|------------------------|----------------------------|-----------|
|           |                              | Facility          | Non-Facility | Facility Limiting Cost | Non-Facility Limiting Cost | Mean Cost |
| E/M       |                              |                   |              |                        |                            |           |
| 99203     | New patient visit, level 3   | 109.60            | 77.98        | 119.73                 | 85.19                      | 98.13     |
| 99204     | New patient visit, level 4   | 166.73            | 131.88       | 182.15                 | 144.07                     | 156.21    |
| 99213     | Est. patient visit, level 3  | 73.30             | 51.74        | 80.08                  | 56.14                      | 65.32     |
| 99214     | Est. patient visit, level 4  | 108.88            | 79.41        | 118.95                 | 86.76                      | 98.50     |
| Procedure |                              | Physician fee*    | Facility Fee | Totals                 |                            |           |
| 30140     | Inferior turbinate reduction | 658.60            | 1053.80      | 1712.40                |                            |           |
| 30520     | Septoplasty                  | 465.24            | 1053.80      | 1519.04                |                            |           |
| 30465     | Repair of nasal stenosis     | 1036.79           | 2013.70      | 3050.49                |                            |           |
| Totals    |                              | 2160.63           | 4121.3       | 6218.93                |                            |           |

All cost data was obtained via the 2015 CMS.gov physician fee schedule. E/M physician reimbursement reflects several factors; first, whether the healthcare provider performs the service in a facility setting (such as a hospital or ambulatory surgery center) versus an office (non-facility). Next, a limiting charge is applied when the healthcare provider is not a participating provider of Medicare or does not accept Medicare assignment. Depending on the setting of the service, the limiting charge is the maximum amount a beneficiary may be charged for the service and is calculated as percentage of the approved reimbursement rate for participating providers. Lastly, depending on the geographic location the service is performed, reimbursement rates may vary. Herein we used the national carrier locality, a national, centralized location reflecting the national payment amount. The final column ‘average cost’ reflects the average of the facility, non-facility, facility limiting and non-facility limiting costs. (\*Physician fee calculated as average of non-facility and facility limiting cost; Facility fees based on CMS.gov 2015 ambulatory surgery center cost).

**eTable 2.** Demographics and History of Patients Who Responded to Nasal Corticosteroid Treatment

|     |     | NOSE severity |              |          |    |        |
|-----|-----|---------------|--------------|----------|----|--------|
| Age | Sex | Pre steroid   | Post steroid | Exam     | AR | Trauma |
| 38  | m   | mild          | mild         | S, ITH   | y  | y      |
| 27  | m   | moderate      | mild         | OSD, ITH | y  | y      |
| 41  | m   | moderate      | moderate     | S, ITH   | y  | n      |
| 27  | f   | moderate      | moderate     | S        | y  | y      |
| 41  | m   | severe        | moderate     | CSD      | n  | n      |
| 58  | m   | severe        | moderate     | CSD      | n  | n      |
| 33  | m   | severe        | moderate     | CSD      | y  | n      |
| 39  | m   | extreme       | severe       | OSD      | y  | n      |

(AR=allergic rhinitis history, S=septal spur, ITH=inferior turbinate hypertrophy, CSD=caudal septal deviation, OSD=other septal deviation)

**eTable 3.** Cost of Intranasal Corticosteroid Sprays

|                                                                | <b><u>BANS</u></b> | <b><u>FPNS*</u></b> | <b><u>MFNS</u></b> | <b><u>TANS</u></b> |
|----------------------------------------------------------------|--------------------|---------------------|--------------------|--------------------|
| Average wholesale price for 1-month prescription               | 35.66              | 13.96               | 68.73              | 70.31              |
| Mean cost of INS per day based on mean prescribed daily dosage | 1.54               | 0.46                | 1.8                | 1.97               |
| Days of treatment per prescription filled                      | 44                 | 30                  | 38                 | 34                 |

|                                                   |  |
|---------------------------------------------------|--|
| BANS=budesonide aqueous nasal spray               |  |
| FPNS =fluticasone propionate nasal spray          |  |
| TANS= triamcinolone acetonide aqueous nasal spray |  |
| MFNS= mometasone furoate nasal spray              |  |

\*Cost reflects the new generic price point for fluticasone propionate inhaled nasal corticosteroid. The cheapest over-the-counter/retail price available online was utilized for this study, as of June 2015. )
